# Supplementary material for: Lymphoid Organ Proteomes Identify Therapeutic Efficacy Biomarkers Following the Intracavitary Administration of Curcumin in a Highly Invasive Rat Model of Peritoneal Mesothelioma
Source: MDPI journal article supplement (doi:10.3390/ijms22168566), 2021-08-09
Supplement: s1 [file s1]

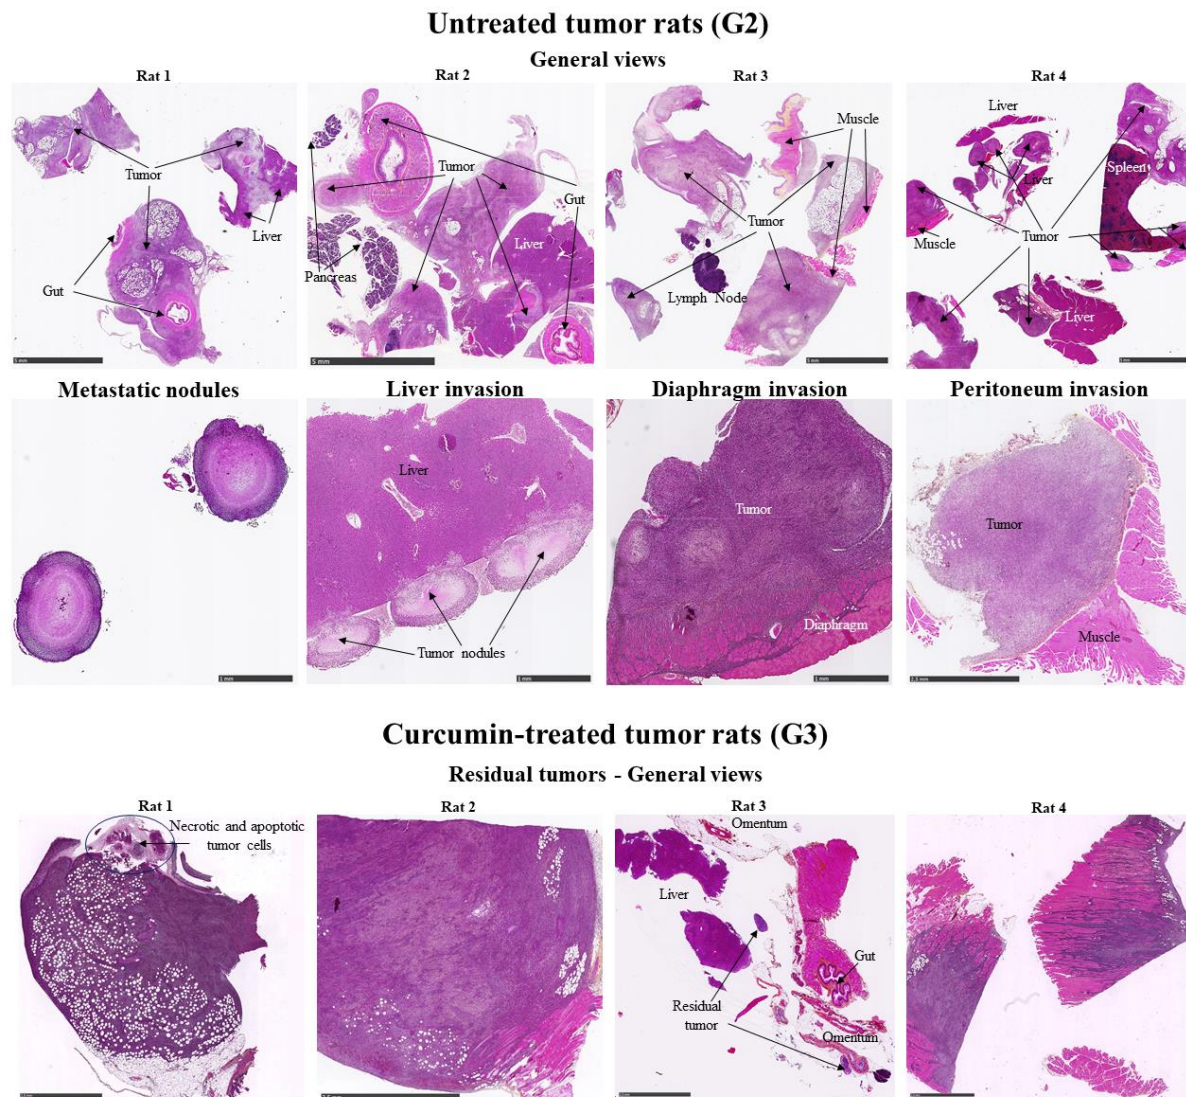

**Figure S1.** General views and histological features of M5-T1 tumors collected in each rat of the G2 and G3 groups. HPS staining, the scale bars are indicated at the bottom of each photograph.

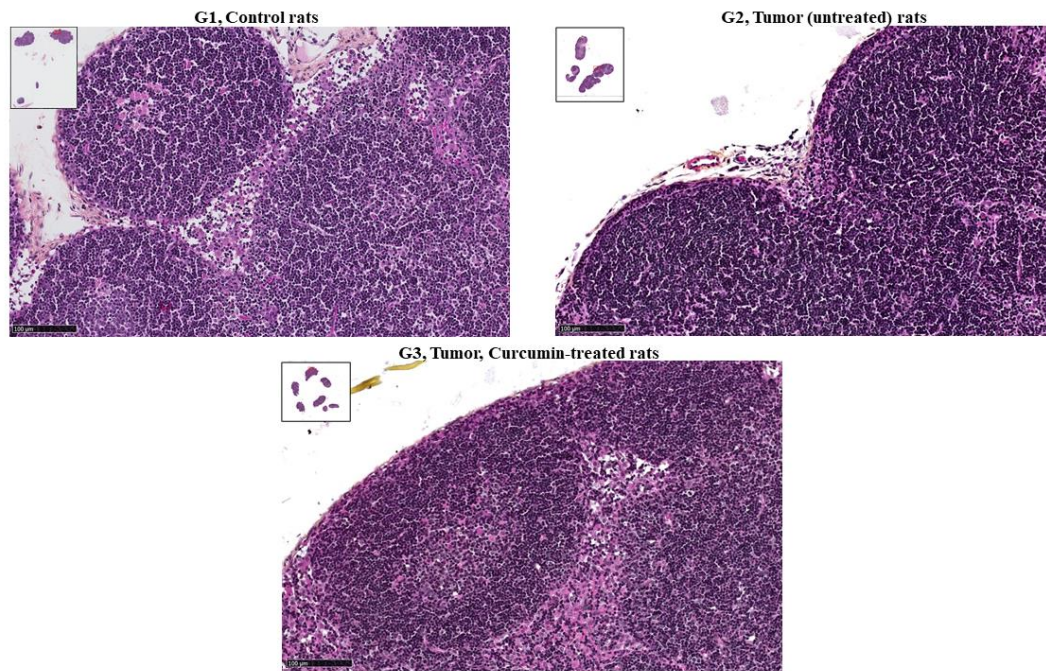

**Figure S2.** Representative examples of the histological features of mesenteric lymph nodes from the three groups of rats. HPS staining,  $\times 200$ , the scale bars represent  $100\ \mu\text{m}$ . Inserts show general views of the whole samples with red rectangles representing locations of selected areas.

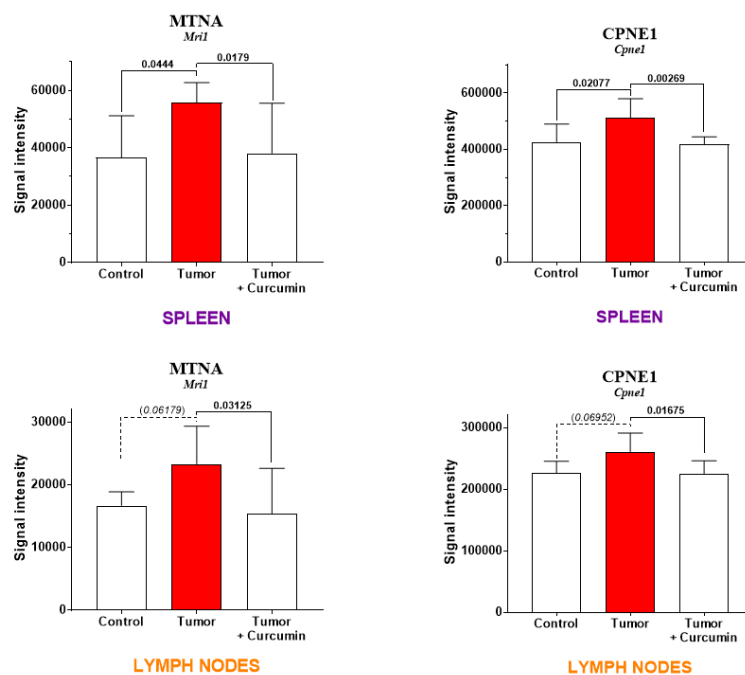

**Figure S3.** Additional proteins of interest (supplement to Figure 5) exhibiting common profiles of abundance changes in spleen and mesenteric lymph nodes. Dashed lines represent tendencies, with corresponding *p* values in italics.
